# Supplementary material
Source: PubMed Central journal article supplement (PMC2786030)
Supplement: supp_M109.029371_jbc.M109.029371-1.pdf [file supp_M109.029371_jbc.M109.029371-1.pdf]

# **The Bloom's syndrome helicase stimulates RAD51 DNA strand exchange activity through a novel ATPase-independent mechanism**

Dmitry V. Bugreev, Olga M. Mazina, and Alexander V. Mazin\*

Department of Biochemistry and Molecular Biology, Drexel University College of Medicine, Philadelphia, PA 19102-1192, USA.

**Supplementary Figure S1**

**Supplementary Figure Legends**

**Supplementary Table S1**

\*Address Correspondence to: Alexander Mazin, Department of Biochemistry and Molecular Biology, Drexel University College of Medicine, 245 N 15<sup>th</sup> Street, NCB, Room 10103, Philadelphia, PA 19102-1192; Tel. 215-762-7195; Fax. 215-762-4452; E-mail: [amazin@drexelmed.edu](mailto:amazin@drexelmed.edu).

**A**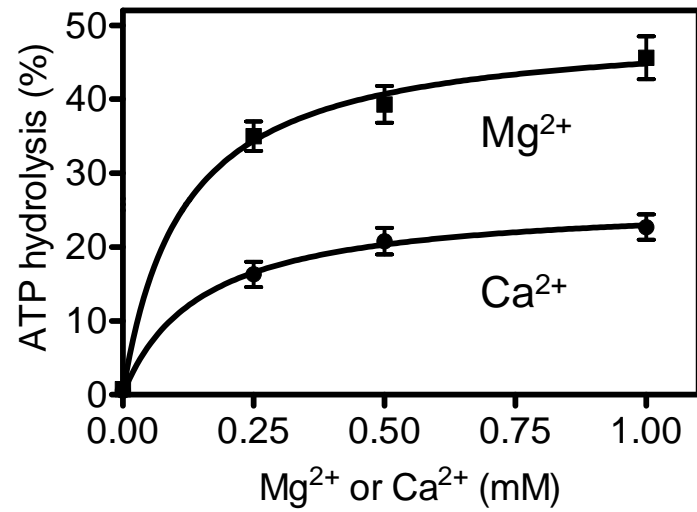**B**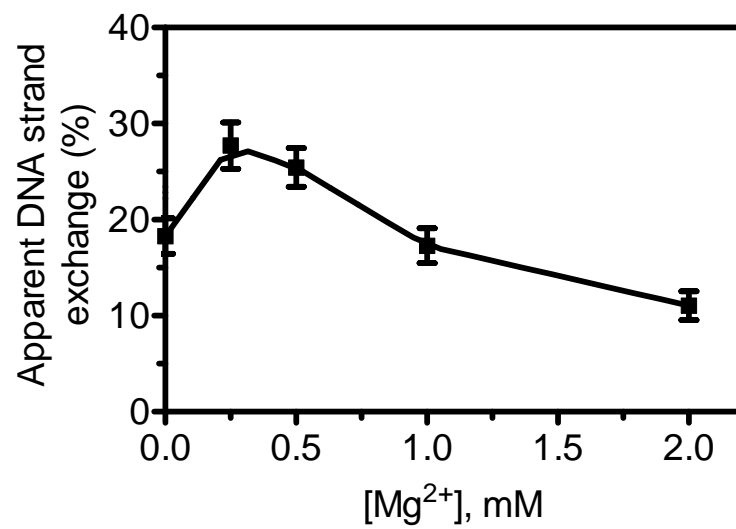

## SUPPLEMENTARY FIGURE LEGENDS

### Supplementary Figure S1. The effect of $Mg^{2+}$ concentration on the biochemical

**activities of BLM.** (A) The ATPase activity of BLM. The BLM protein (10 nM) was incubated with polydT ssDNA (10  $\mu$ M) and 1 mM ATP, 0.2  $\mu$ Ci of [ $\gamma$ - $^{32}$ P]ATP (6000 Ci/mmol) in reaction buffer (10  $\mu$ l) containing 25 mM Tris acetate, pH 7.5, 2 mM DTT, 25 mM KCl, 100  $\mu$ g/ml BSA, and indicated  $MgCl_2$ , or  $CaCl_2$  concentrations at 37  $^{\circ}$ C for 30 min. The level of ATP hydrolysis was determined using TLC on PEI-cellulose plates in running buffer containing 1 M formic acid and 0.3 M LiCl. The products of ATP hydrolysis were quantified using a Storm 840 PhosphorImager (Molecular Dynamics).

(B) Apparent DNA strand exchange promoted by BLM. BLM (100 nM) was mixed with ssDNA (#71; 32 nM, molecules) in buffer containing 25 mM Tris acetate, pH 7.5, 1 mM ATP, 2 mM DTT, BSA (100  $\mu$ g/ml), 20 mM phosphocreatine, and creatine phosphokinase (30 units/ml) and indicated concentrations of magnesium acetate. To start the reaction  $^{32}$ P-labeled dsDNA (#5/#6; 32 nM, molecules) was added followed by 15 min incubation at 37  $^{\circ}$ C. The reactions were terminated and deproteinized by addition of stop buffer up to 1.5% SDS and proteinase K (800  $\mu$ g/ml) for 5 min at 25  $^{\circ}$ C, mixed with a 0.1 volume of loading buffer (70% glycerol, 0.1% bromophenol blue) and analyzed by electrophoresis in 10% native polyacrylamide gels in TBE buffer (90 mM Tris-borate, pH 8.3, and 1 mM EDTA) at 135 V for 1.5 hr.

**SUPPLEMENTARY TABLE S1.** Sequences of the oligonucleotides used in this study

| N   | Length,<br>nt | Sequence<br>(5'→3')                                                                                   |
|-----|---------------|-------------------------------------------------------------------------------------------------------|
| 5   | 32            | CCATCCGCAAAAATGACCTCTTATCAAAGGA                                                                       |
| 6   | 32            | TCCTTTTGATAAGAGGTCATTTTGC GGATGG                                                                      |
| 71  | 94            | CTTTAGCTGCATATTTACAACATGTTGACCTACAGCACCAGA<br>TTCAGCAATTAAGCTCTAAGCCATCCGCAAAAATGACCTCTT<br>ATCAAAGGA |
| 90  | 90            | CGGGTGTCCGGGGCTGGCTTAACTATGCGGCATCAGAGCAG<br>ATTGTA CTGAGAGTGCACCATATGCGGTGTGAAATACCGCA<br>CAGATGCGT  |
| 422 | 90            | CGGGTGCCGGGGCTAGCTTAACTTTGCGGCATCAGCGCAG<br>ATTGTA CTTAGAGTGCACCCTATGCGTTGTGAAATACCACAC<br>AGATGCGA   |
| 423 | 90            | CGGGTGCCGGGGCTGGCTTAACTTTGCGGCATCAGAGCAG<br>ATTATA CTGAGAGTGCACCCTATGCGGTGTGAAATACCACAC<br>AGATGCGT   |
